# Supplementary material for: Ozone Pollution over China and India: Seasonality and Sources
Source: Copernicus journal article supplement (doi:10.5194/acp-2019-875), 2019-11-08
Supplement: Supplementary file 1 [file acp-2019-875-supplement.pdf]

## Supplemental Information

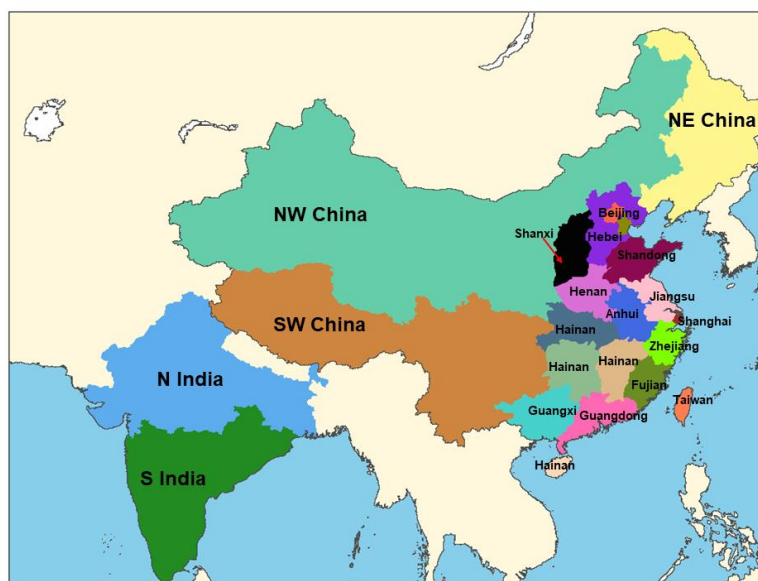

Fig. S1. Source regions are marked in different colors

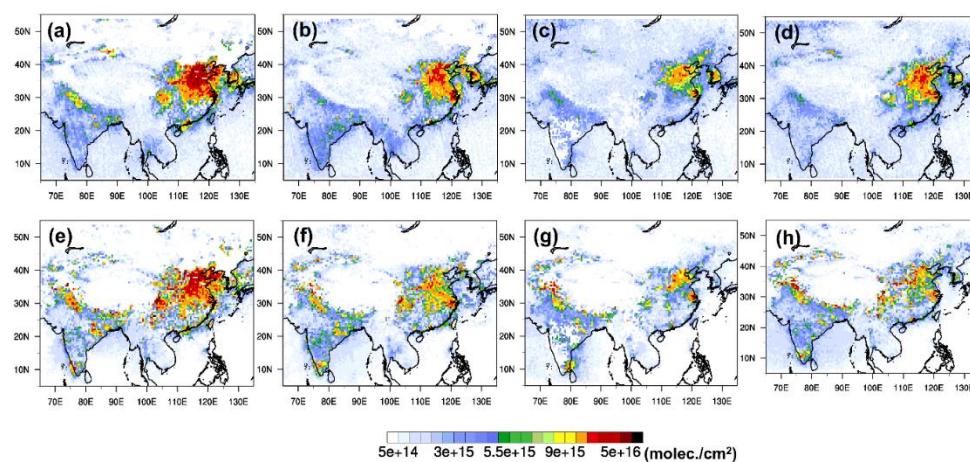

Fig. S2. Modeled and satellite observed NO<sub>2</sub> column for winter (a, e), spring (b, f), summer (c, g) and autumn (d, h)

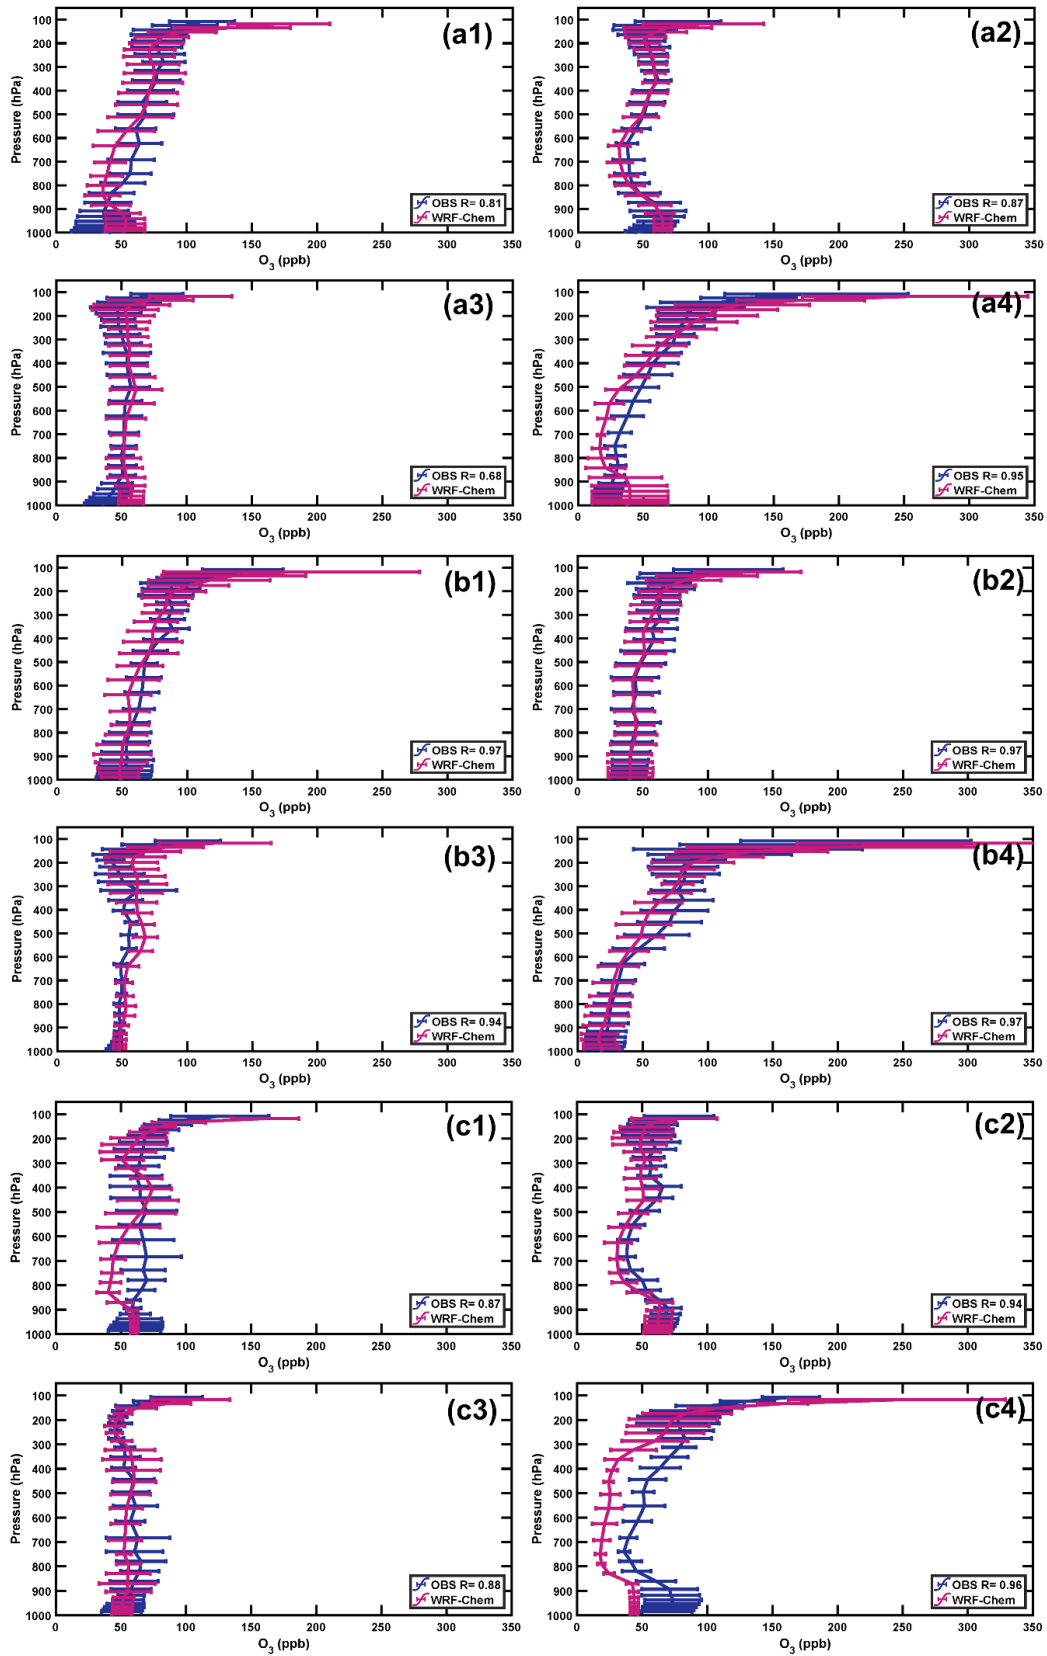

Fig. S3. Observed and simulated seasonal mean O<sub>3</sub> concentrations for the HKO (Hong Kong Observatory, a1-a4), JMA (Japan Meteorological Agency, b1-b4), and HSSRV (Hydrometeorological Service of S.R. Vietnam, c1-c4) stations.

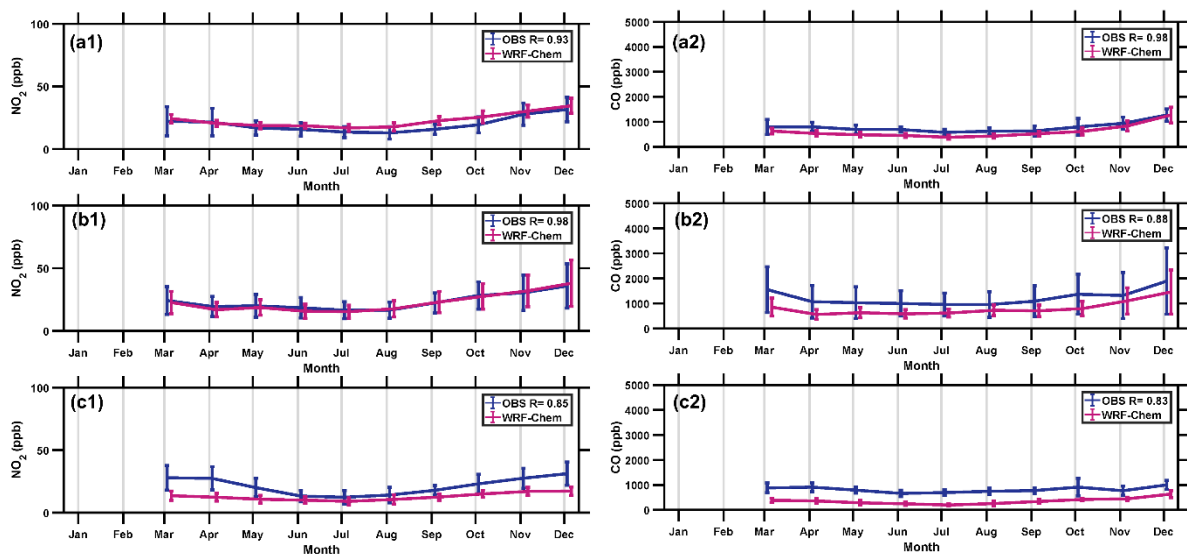

Fig. S4. Modeled and observed monthly concentrations of NO<sub>2</sub> and CO in NCP (a1-a2), YRD (b1-b2), and PRD (c1-c2)
